# Supplementary material for: Diversity of the Bacterial and Viral Communities in the Tropical Horse Tick, Dermacentor nitens, in Colombia
Source: MDPI journal article supplement (doi:10.3390/pathogens12070942), 2023-07-16
Supplement: s1 [file s1]

## Article

# Diversity of the Bacterial and Viral Communities in the Tropical Horse Tick, *Dermacentor nitens*, in Colombia

Andres F. Holguin-Rocha <sup>1</sup>, Arley Calle-Tobon <sup>2</sup>, Gissella M. Vásquez <sup>3</sup>, Helvio Astete <sup>3</sup>, Michael L. Fisher <sup>3,4</sup>, Alberto Tobon-Castano <sup>5</sup>, Gabriel Velez-Tobon <sup>5</sup>, L. Paulina Maldonado-Ruiz <sup>1</sup>, Kristopher Silver <sup>1</sup>, Yoonseong Park <sup>1,\*</sup> and Berlin Londono-Renteria <sup>6,\*</sup>

- <sup>1</sup> Department of Entomology, Kansas State University, Manhattan, KS 66506, USA; aholguin@ksu.edu (A.F.H.-R.); lpmaldonado@ksu.edu (L.P.M.-R.); ksilver@ksu.edu (K.S.)  
<sup>2</sup> Grupo Entomologia Medica, Facultad de Medicina, Universidad de Antioquia, Medellin, Colombia; credoest@gmail.com  
<sup>3</sup> U.S. Naval Medical Research Unit No. 6 (NAMRU-6), Bellavista, Callao, Peru; gissella.m.vasquez.ln@health.mil (G.M.V.); astetehelvio@gmail.com (H.A.); michael.l.fisher2@navy.mil (M.L.F.);  
<sup>4</sup> Navy Warfare Development Center, Norfolk, VA, USA (Current Affiliation)  
<sup>5</sup> Grupo Malaria, Facultad de Medicina, Universidad de Antioquia, Medellin, Colombia; alberto.tobon1@udea.edu.co (A.T.-C.); gabrielj.velez@udea.edu.co (G.V.-T.)  
<sup>6</sup> School of Public Health and Tropical Medicine, Tulane University, New Orleans, LA, USA  
\* Correspondence: ypark@ksu.edu (Y.P.); blondono@tulane.edu (B.L.-R.)

## Supplementary Material

**Table S1.** List of library sequences obtained in the metatranscriptomics study. Each pool comprises five *Dermacentor nitens* females. Refer to the Material and Methods section for more details about cleaning and mapping processes.

| Library | Location  | Raw Reads (Million) | Clean Reads (Million) | Mapped Reads against Horse and <i>Dermacentor</i> Ticks (Million) | Remaining Reads (Million) |
|---------|-----------|---------------------|-----------------------|-------------------------------------------------------------------|---------------------------|
| Pool 01 | Bolivar   | 15.2                | 14.2                  | 1.6                                                               | 12.55                     |
| Pool 02 | Bolivar   | 14.1                | 13.2                  | 5                                                                 | 8.18                      |
| Pool 03 | Bolivar   | 15.9                | 14.8                  | 5.2                                                               | 9.67                      |
| Pool 04 | Antioquia | 19.2                | 17.8                  | 2.5                                                               | 15.37                     |
| Pool 05 | Antioquia | 18.1                | 16.8                  | 6.1                                                               | 10.58                     |
| Pool 06 | Antioquia | 15.7                | 14.7                  | 5.1                                                               | 9.54                      |
| Pool 07 | Cordoba   | 16.6                | 15.6                  | 1.9                                                               | 13.7                      |
| Pool 08 | Cordoba   | 15.3                | 14.4                  | 5.9                                                               | 8.4                       |
| Pool 09 | Cordoba   | 22.1                | 21.3                  | 17.2                                                              | 4.19                      |
| Total   |           | 152.2               | 142.8                 | 50.5                                                              | 92.18                     |

**Table S2.** Relative abundances of *Francisella*-Like Endosymbiont (FLE) captured in 16S sequencing. Heat map shows the percent abundance for each bacterial OTU identified as *Francisella*/*Francisellaceae*.

| OTU Id | Bolivar | Antioquia | Cordoba |
|--------|---------|-----------|---------|
| Otu001 | 61%     | 56%       | 59%     |
| Otu010 | 18%     | 15%       | 22%     |
| Otu002 | 10%     | 5%        | 3%      |

**Table S3.** The coverages of contigs for *Francisella*-Like Endosymbiont (FLE) genes. The coverages are shown by the log<sub>10</sub> (transcript per million) in the metatranscriptome analysis. In the heat map, white is for low and red is for high frequency.

| Sequence name | Bolivar | Antioquia | Cordoba |
|---------------|---------|-----------|---------|
|---------------|---------|-----------|---------|

|                               |      |      |      |
|-------------------------------|------|------|------|
| Contig_ORF_FLE_of_D.nitens_13 | 3.75 | 5.71 | 8.03 |
| Contig_ORF_FLE_of_D.nitens_1  | 2.97 | 4.78 | 7.17 |
| Contig_ORF_FLE_of_D.nitens_9  | 2.70 | 5.09 | 6.91 |
| Contig_ORF_FLE_of_D.nitens_7  | 2.32 | 4.31 | 6.41 |
| Contig_ORF_FLE_of_D.nitens_8  | 2.28 | 4.22 | 6.34 |
| Contig_ORF_FLE_of_D.nitens_6  | 1.85 | 4.18 | 6.20 |
| Contig_ORF_FLE_of_D.nitens_3  | 1.89 | 4.11 | 5.98 |
| Contig_ORF_FLE_of_D.nitens_2  | 1.88 | 3.94 | 6.06 |
| Contig_ORF_FLE_of_D.nitens_4  | 1.78 | 4.09 | 5.96 |
| Contig_ORF_FLE_of_D.nitens_5  | 2.08 | 3.46 | 5.89 |
| Contig_ORF_FLE_of_D.nitens_12 | 1.45 | 3.37 | 5.61 |
| Contig_ORF_FLE_of_D.nitens_11 | 0.56 | 2.77 | 5.06 |
| Contig_ORF_FLE_of_D.nitens_10 | 0.64 | 2.16 | 4.62 |

**Table S4.** The coverages of virus contigs shown by  $\log_{10}$ (transcript per million) for the metatranscriptome of *D. nitens*. In the heat map, white is for low and red is for high frequency.

| Sequence name                                    | Bolivar | Antioquia | Cordoba |
|--------------------------------------------------|---------|-----------|---------|
| D. nitens_Colombia_Flaviviridae_Polyprotein_6    | 5.96    | 7.28      | 7.50    |
| D.nitens_Colombia_Chuviridae_RdRp_5              | 1.61    | 3.57      | 1.06    |
| D. nitens_Colombia_Chuviridae_Glycoprotein_2     | 0.97    | 2.54      | 0.98    |
| D. nitens_Colombia_Rhabdoviridae_RdRp_1          | 0.90    | 0.30      | 2.30    |
| D. nitens_Colombia_Rhabdoviridae_RdRp_1          | 0.62    | 0.00      | 2.61    |
| D. nitens_Colombia_Rhabdoviridae_RdRp_1          | 0.21    | 0.48      | 2.46    |
| D. nitens_Colombia_Rhabdoviridae_RdRp_1          | 0.21    | 0.00      | 2.09    |
| D. nitens_Colombia_Rhabdoviridae_Nucleocapsid_3  | 0.44    | 0.00      | 0.00    |
| D. nitens_Colombia_Unclassified_Capsid_Protein_1 | 0.00    | 0.00      | 0.14    |

**Table S5.** Pairwise comparisons of the frequencies (transcript per million, TPM) in virus contigs among the ticks collected in different locations. The statistics were empirical Bayes estimation and exact tests ( $\alpha = 0.05$ ) in the pairwise comparisons of the frequencies of the paired two regions.  $p < 0.05$  is highlighted.

| Sequence Name                 | Bolivar-Antioquia | Bolivar-Cordoba | Antioquia-Cordoba |
|-------------------------------|-------------------|-----------------|-------------------|
|                               | P-value           | P-value         | P-value           |
| Rhabdoviridae_Nucleocapsid_3  | 0.035130971       | 0.031573397     | 1                 |
| Rhabdoviridae_Polymerase_1C   | 0.123213517       | 0.221619581     | 0.028354078       |
| Rhabdoviridae_Polymerase_1D   | 0.179418638       | 0.422800509     | 0.082456668       |
| Rhabdoviridae_Polymerase_1B   | 0.30061269        | 0.789734348     | 0.219269539       |
| Chuviridae_Polymerase_5       | 0.46796584        | 0.44991904      | 0.192016665       |
| Chuviridae_Glycoprotein_2     | 0.484497213       | 0.794271421     | 0.366869359       |
| Rhabdoviridae_Polymerase_1A   | 0.907602552       | 0.231983583     | 0.248901999       |
| Flaviviridae_Polyprotein_6    | 0.983445117       | 0.982669254     | 0.999577095       |
| Unclassified_Capsid_Protein_1 | 1                 | 1               | 1                 |

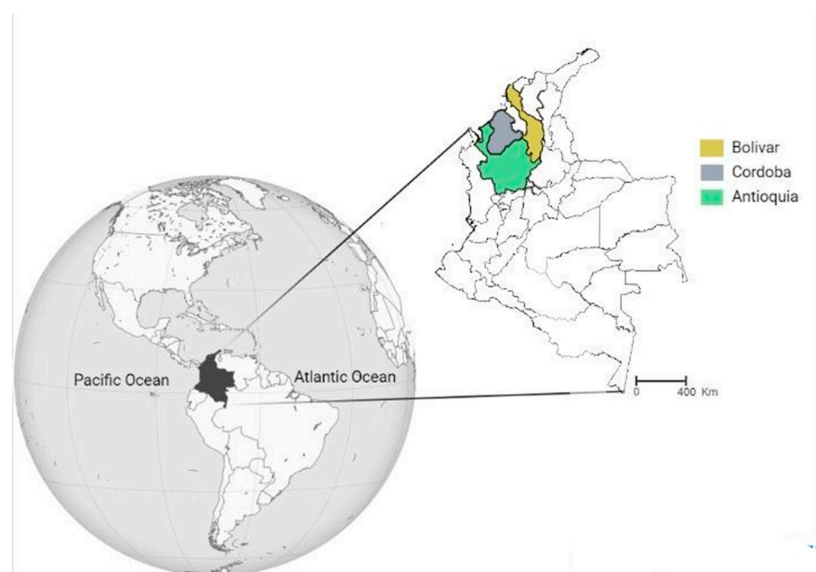

**Figure S1.** Locations of origin of horses from which ticks were sampled in this study. Colored zones represent the three different departments. Information was obtained from Instituto Geográfico Agustín Codazzi, and figure.

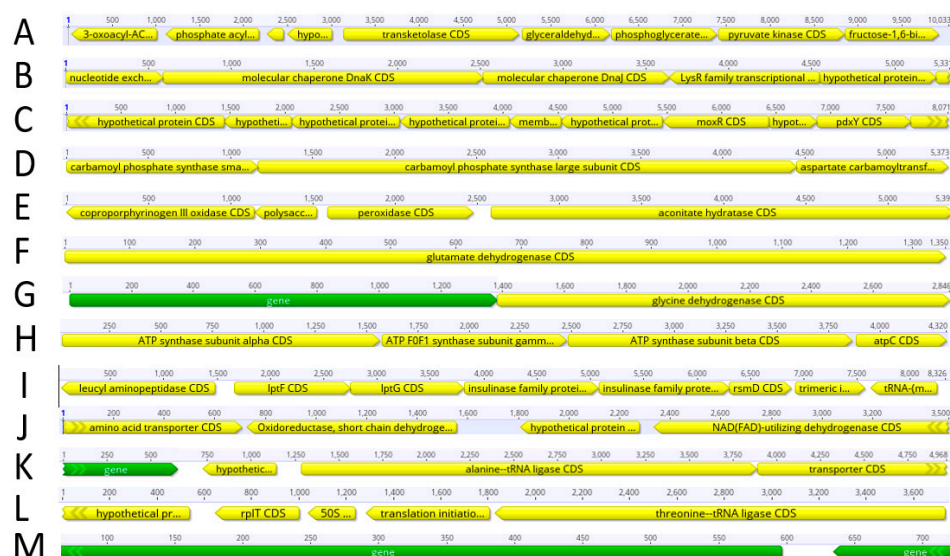

**Figure S2.** Graphical representation of the genes annotated for each contig identified as *Francisella*-Like Endosymbiont (FLE) obtained from the partially-fed *D. nitens* female pools. (A) represents the contig named Contig\_ORF\_D.nitens\_FLE\_1. (B) represents the contig named Contig\_ORF\_D.nitens\_FLE\_2. (C) represents the contig named Contig\_ORF\_D.nitens\_FLE\_3. (D) represents the contig named Contig\_ORF\_D.nitens\_FLE\_4. (E) represents the contig named Contig\_ORF\_D.nitens\_FLE\_5. (F) represents the contig named Contig\_ORF\_D.nitens\_FLE\_6. (G) represents the contig named Contig\_ORF\_D.nitens\_FLE\_7. (H) represents the contig named Contig\_ORF\_D.nitens\_FLE\_8. (I) represents the contig named Contig\_ORF\_D.nitens\_FLE\_9. (J) represents the contig named Contig\_ORF\_D.nitens\_FLE\_10. (K) represents the contig named Contig\_ORF\_D.nitens\_FLE\_11. (L) represents the contig named Contig\_ORF\_D.nitens\_FLE\_12. (M) represents the contig named Contig\_ORF\_D.nitens\_FLE\_13. The genes represented in yellow color correspond to previously known annotated genes available on the NCBI website database, genes represented with green color are current non-annotated predicted genes obtained from the homology-based search at the NCBI databases.

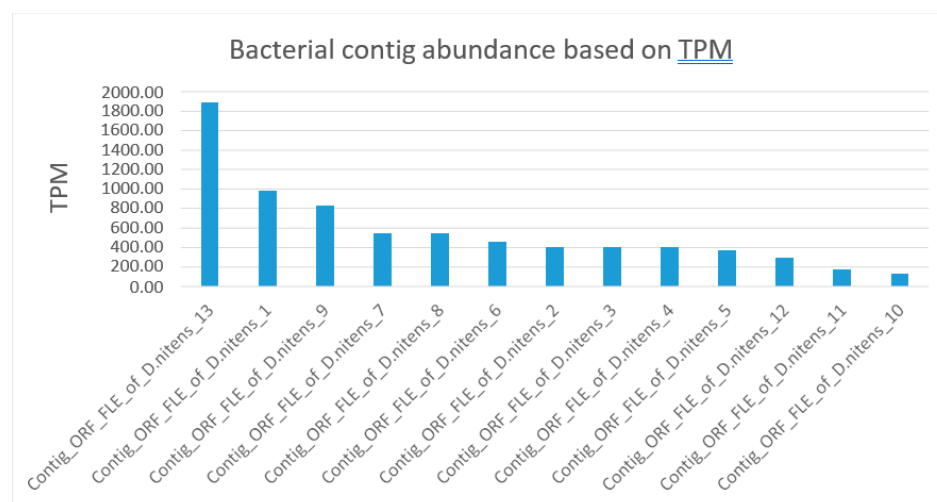

**Figure S3.** Abundance of FLE contigs in the metatranscriptome of *D. nitens*.

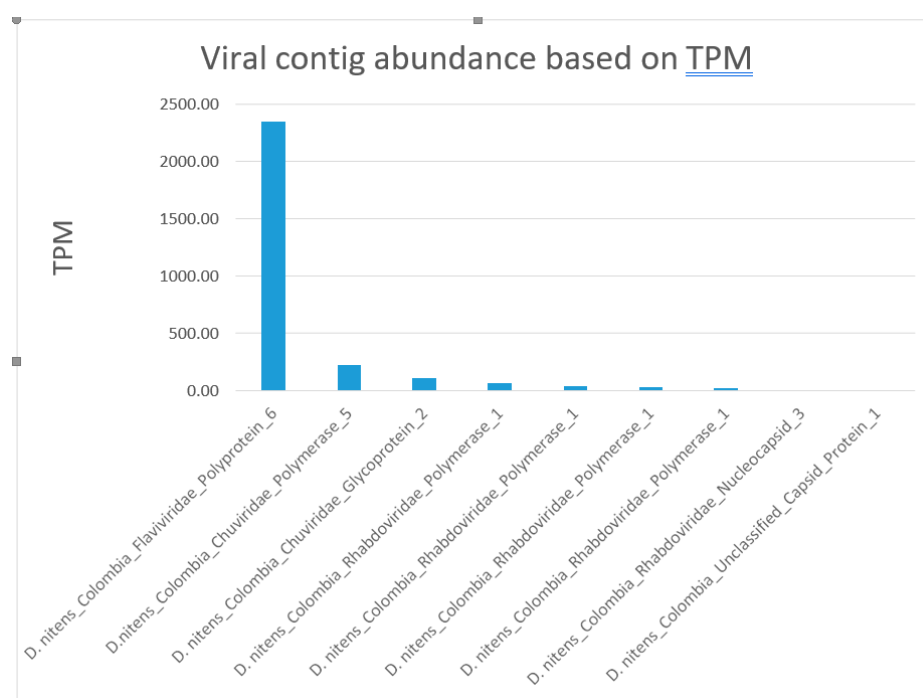

**Figure S4.** Abundance of virus contigs in the metatranscriptome of *D. nitens*.
